# Supplementary material for: Antagonizing Glutamine Bioavailability Promotes Radiation Sensitivity in Prostate Cancer
Source: MDPI journal article supplement (doi:10.3390/cancers14102491), 2022-05-19

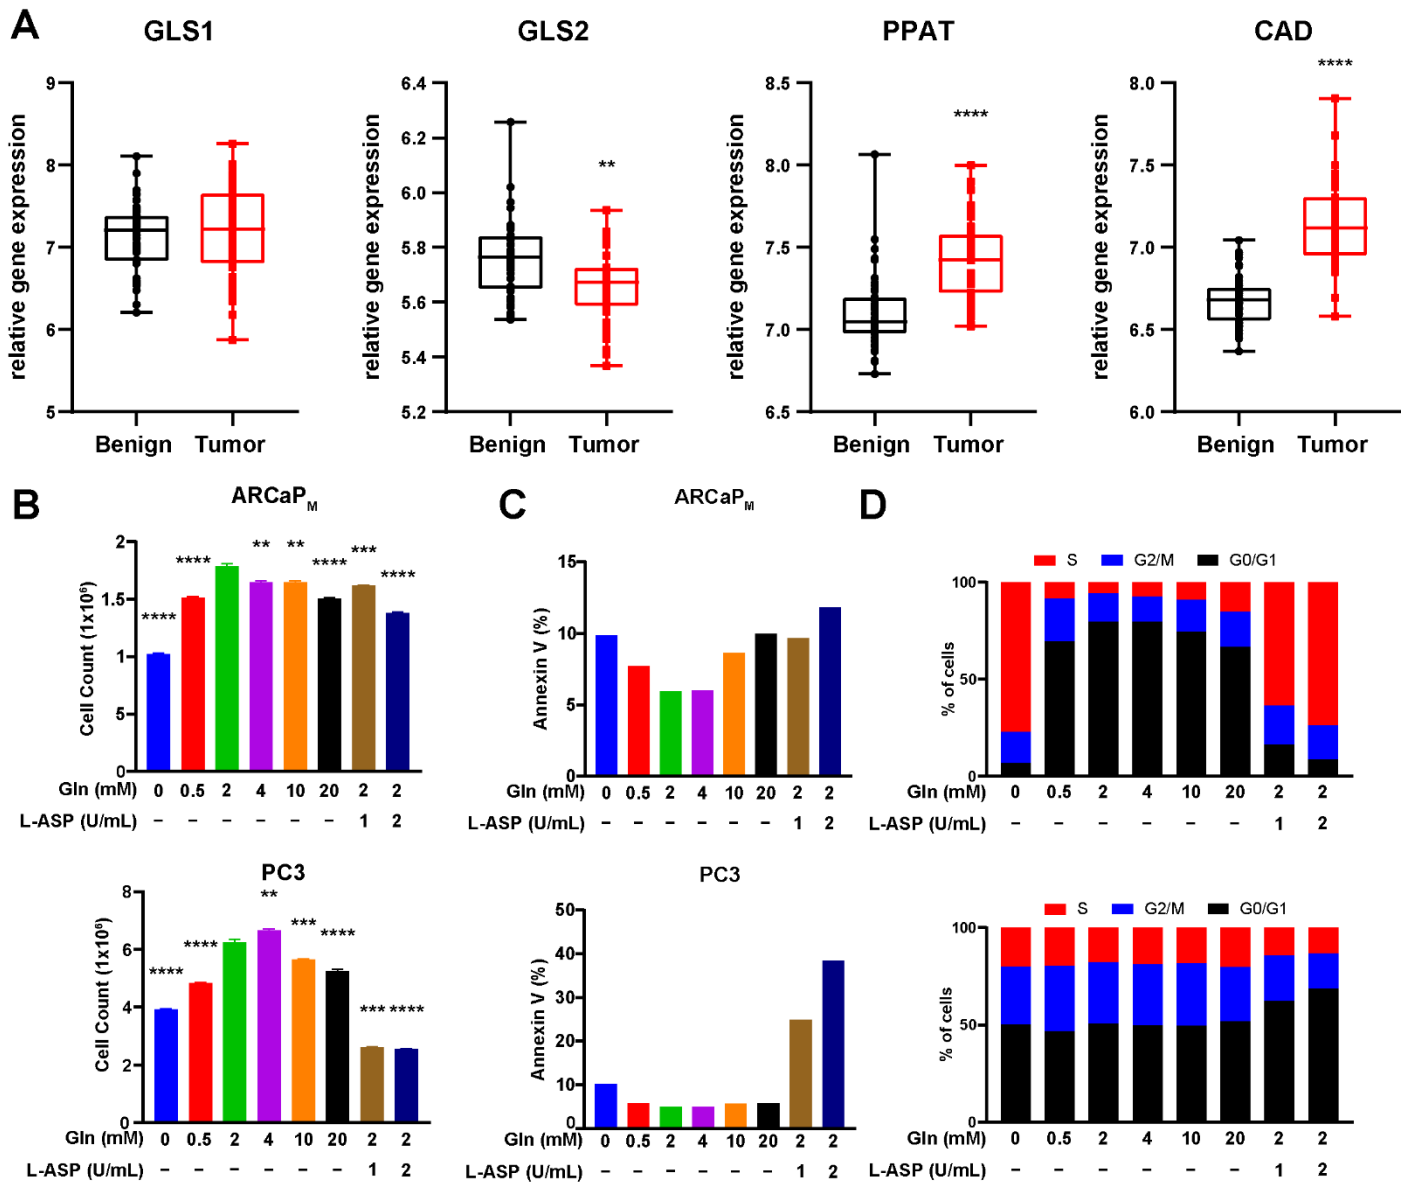

**Figure S1.** (A) Fold change of GLS1, GLS2, PPAT and CAD in benign and prostate cancer patients in the gse29079 data set, obtained from R2-Genomics analysis (n = 95). (B) ARCaP<sub>M</sub> and PC3 cells were counted after culturing in media containing indicated concentrations of glutamine (L-Gln) and L-ASP for 48 hrs. (C) Apoptotic status of PC3 and ARCaP<sub>M</sub> were determined by FACS analysis of cell surface Annexin V after treatment with indicated concentrations of L-Gln. (D) Cell cycle analysis was performed on PC3 and ARCaP<sub>M</sub> cells following incubation under control conditions or treatment with L-ASP.

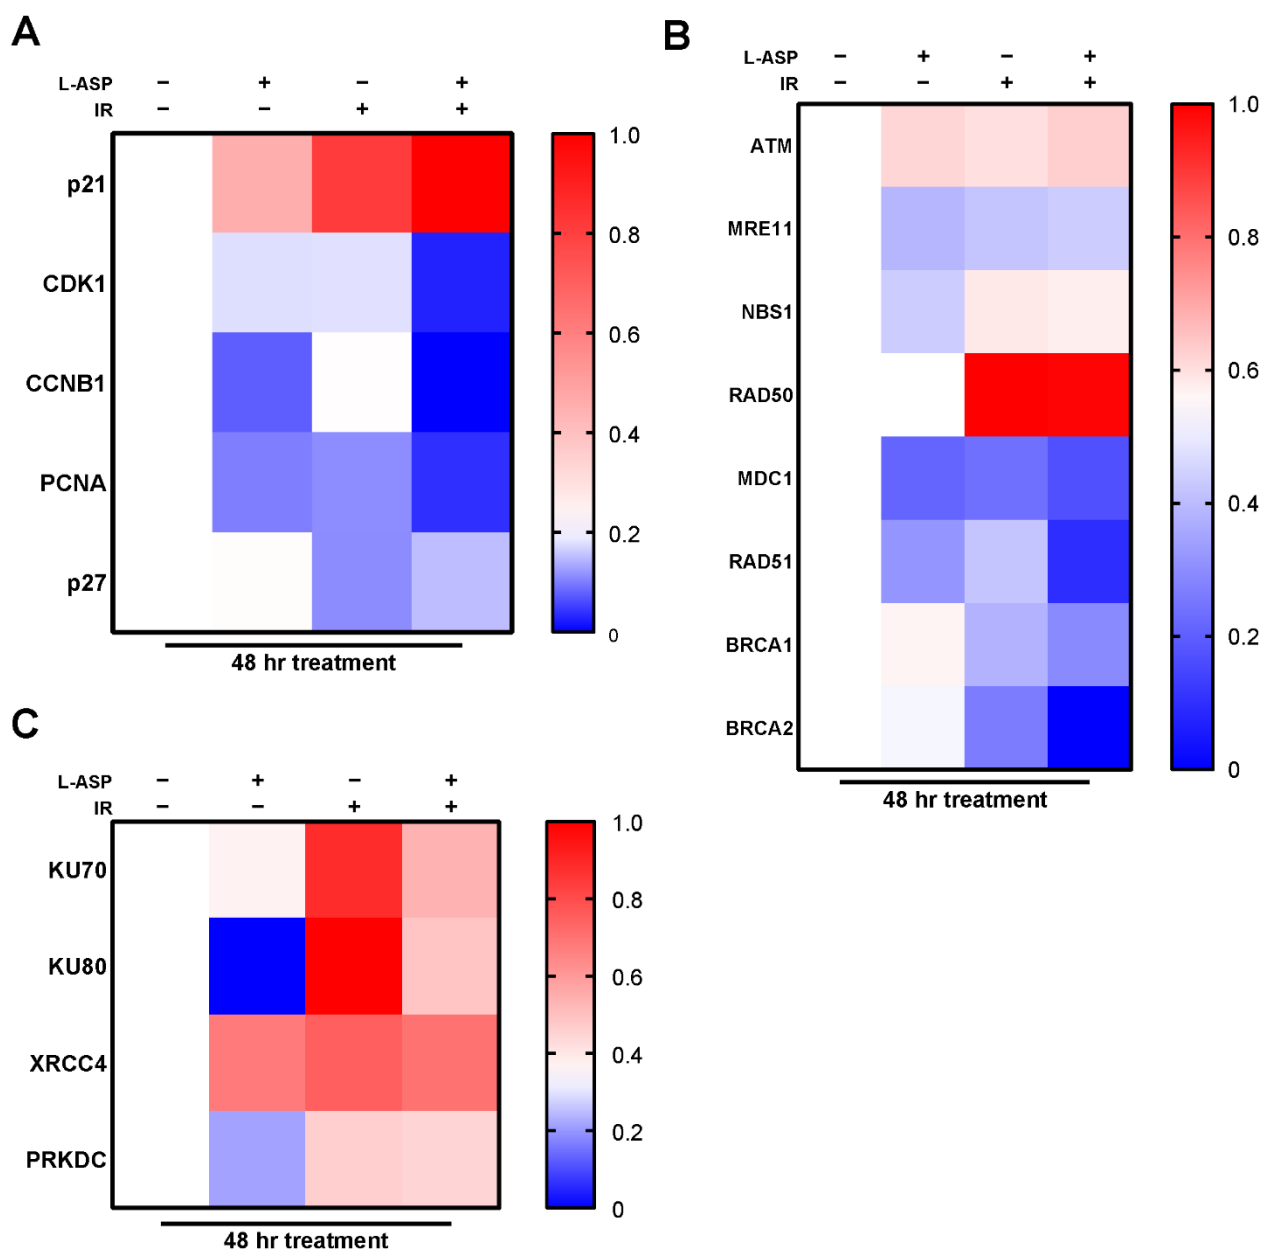

**Figure S2.** 22RV1 cells were incubated with L-ASP (2 IU/ml) and administered 4 Gy of radiation. Cells were harvested 48 hrs. after irradiation (IRR). (A) mRNA expression of cell cycle checkpoint markers were determined by RT-PCR. (B) mRNA expression of factors involved with homologous recombination of DNA repair were determined by RT-PCR. (C) mRNA expression of factors involved with non-homologous end joining were determined by RT-PCR. mRNA expression was normalized to  $\beta$ -actin and untreated samples.

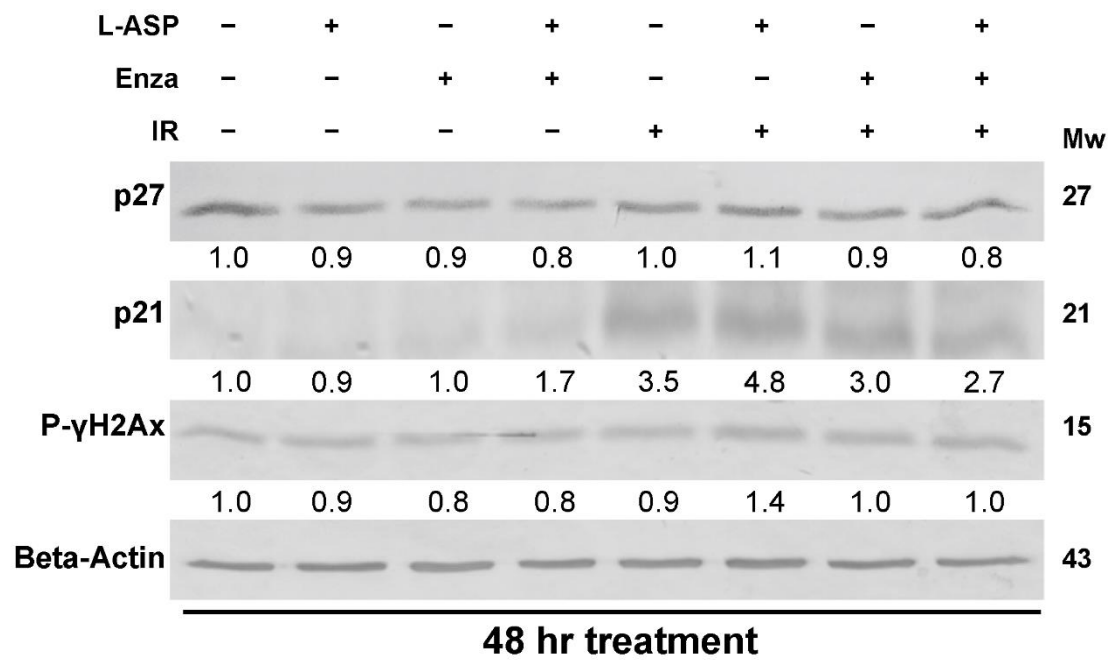

**Figure S3.** 22RV1 cells were incubated with L-ASP (2 IU/ml), enzalutamide (10  $\mu$ M) or both. Cells were harvested 48 hrs. after exposure to 4 Gy of radiation. Western blots of 22RV1 cell lysates were probed for p27, p21, and P- $\gamma$ -H2Ax. Representative blots are shown with mean relative quantitation indicated normalized to  $\beta$ -actin expression. Molecular weights (kDa) are indicated.

**Table S1.** List of primer sequences used for RT-PCR.

| Gene  | Direction | Sequence                       |
|-------|-----------|--------------------------------|
| ACTB  | Forward   | 5'-CTTCGCGGGCGACGAT-3'         |
| ACTB  | Reverse   | 5'-CCACATAGGAATCCTTCTGACC-3'   |
| p21   | Forward   | 5'-AGTCAGTTCCTTGTGGAGCC-3'     |
| p21   | Reverse   | 5'-GCATGGGTCTGACGGACAT-3'      |
| CDK1  | Forward   | 5'-TGGGAAGTTGGTAGCTCTGAA-3'    |
| CDK1  | Reverse   | 5'-CCAGGGTGCTTGCCATGTA-3'      |
| CCNB1 | Forward   | 5'-GACCTGTGTCAGGCTTCTCTG-3'    |
| CCNB1 | Reverse   | 5'-GGTATTTTGGTCTGACTGCTTGC-3'  |
| PCNA  | Forward   | 5'-CCTGCTGGGATATTAGCTCCA-3'    |
| PCNA  | Reverse   | 5'-CAGCGGTAGGTGTCGAAGC-3'      |
| p27   | Forward   | 5'-AGTCAGTTCCTTGTGGAGCC-3'     |
| p27   | Reverse   | 5'-GCATGGGTCTGACGGACAT=3'      |
| CDK4  | Forward   | 5'-ATGGCTACCTCTCGATATGAGC-3'   |
| CDK4  | Reverse   | 5'-CATTGGGACTCTCACACTCT-3'     |
| CDK6  | Forward   | 5'-CCAGATGGCTCTAACCTCAGT-3'    |
| CDK6  | Reverse   | 5'-AACTTCCACGAAAAAGAGGCTT-3'   |
| CCND1 | Forward   | 5'-GCTGCGAAGTGGAAACCATC-3'     |
| CCND1 | Reverse   | 5'-CCTCCTTCTGCACACATTGAA-3'    |
| SOD2  | Forward   | 5'-CTGGACAAACCTCAGCCCTAAC-3'   |
| SOD2  | Reverse   | 5'-AACCTGAGCCTTGACACCAAC-3'    |
| CAT   | Forward   | 5'-GTGCGGAGATTCAACACTGCCA-3'   |
| CAT   | Reverse   | 5'-CGGCAATGTTCTCACACAGACG-3'   |
| NRF2  | Forward   | 5'-CACATCCAGTCAGAAACAGTGG-3'   |
| NRF2  | Reverse   | 5'-GGAATGTCTGCGCCAAAAGCTG-3'   |
| ATM   | Forward   | 5'-TGTTCCAGGACACGAAGGGAGA-3'   |
| ATM   | Reverse   | 5'-CAGGGTTCTCAGCACTATGGGA-3'   |
| NBS1  | Forward   | 5'-TCTGTCAGGACGGCAGGAAAGA-3'   |
| NBS1  | Forward   | 5'-CACCTCCAAAGACAACCTGCGGA-3'  |
| MRE11 | Reverse   | 5'-CAGCAACCAACAAAGGAAGAGGC-3'  |
| MRE11 | Forward   | 5'-GAGTTCCTGCTACGGGTAGAAG-3'   |
| RAD50 | Reverse   | 5'-GGAAGAGCAGTTGTCCAGTTACG-3'  |
| RAD50 | Forward   | 5'-GAGTAAACTGCTGTGGCTCCAG-3'   |
| RAD51 | Reverse   | 5'-TCTCTGGCAGTGATGTCTTGGGA-3'  |
| RAD51 | Forward   | 5'-TAAAGGGCGGTGGCACTGTCTA-3'   |
| MDC1  | Reverse   | 5'-GGAATGTCTGCGCCAAAAGCTG-3'   |
| MDC1  | Forward   | 5'-GCTTCAGGTAAGTAGGAGGCA-3'    |
| SIRT1 | Reverse   | 5'-TAGCCTTGTGAGATAAGGAAGGA-3'  |
| SIRT1 | Forward   | 5'-ACAGCTTCACAGTCAACTTTGT-3'   |
| CHOP  | Reverse   | 5'-GGAAACAGAGTGGTCATTCCC-3'    |
| CHOP  | Forward   | 5'-CTGCTTGAGCCGTTTATTCTC-3'    |
| ku70  | Reverse   | 5'-GGTTTCAAGCCGTTGGTACTGC-3'   |
| ku70  | Forward   | 5'-CTCCAGACACTTGATGAGCAGAG-3'  |
| ku80  | Reverse   | 5'-GTTCTAAAGGTCTTTCAGCAAGA-3'  |
| ku80  | Forward   | 5'-AAAAGCCACGCCGACTTGAGGA-3'   |
| PRKDC | Reverse   | 5'-GCGCCATATCTGTCATCTGCTG-3'   |
| PRKDC | Forward   | 5'-TTATAGCGGCGCTTCAGGTGCA-3'   |
| XRCC4 | Reverse   | 5'-ATGGCTCCTCAGGAGAATCAGC-3'   |
| XRCC4 | Forward   | 5'-GAGGTCTTCTGGGCTGCTGTTT-3'   |
| BRCA1 | Reverse   | 5'-CTGAAGACTGCTCAGGGCTATC-3'   |
| BRCA1 | Forward   | 5'-AGGGTAGCTGTTAGAAGGCTGG-3'   |
| BRCA2 | Reverse   | 5'-GGCTTCAAAAAGCACTCCAGATG-3'  |
| BRCA2 | Forward   | 5'-GGATTCTGTATCTTGTGACGTTCC-3' |
| GLUL  | Reverse   | 5'-TAAGGACCCCTAACAAAGCTGGT-3'  |
| GLUL  | Forward   | 5'-CCGTTTACAGGTGTGCCTCAA-3'    |
| AR    | Reverse   | 5'-AGTCATCGGTGACAGACCCCTT-3'   |
| AR    | Forward   | 5'-GTGCAGCGTTATCTCCAACAG-3'    |

# RAW FIGURES

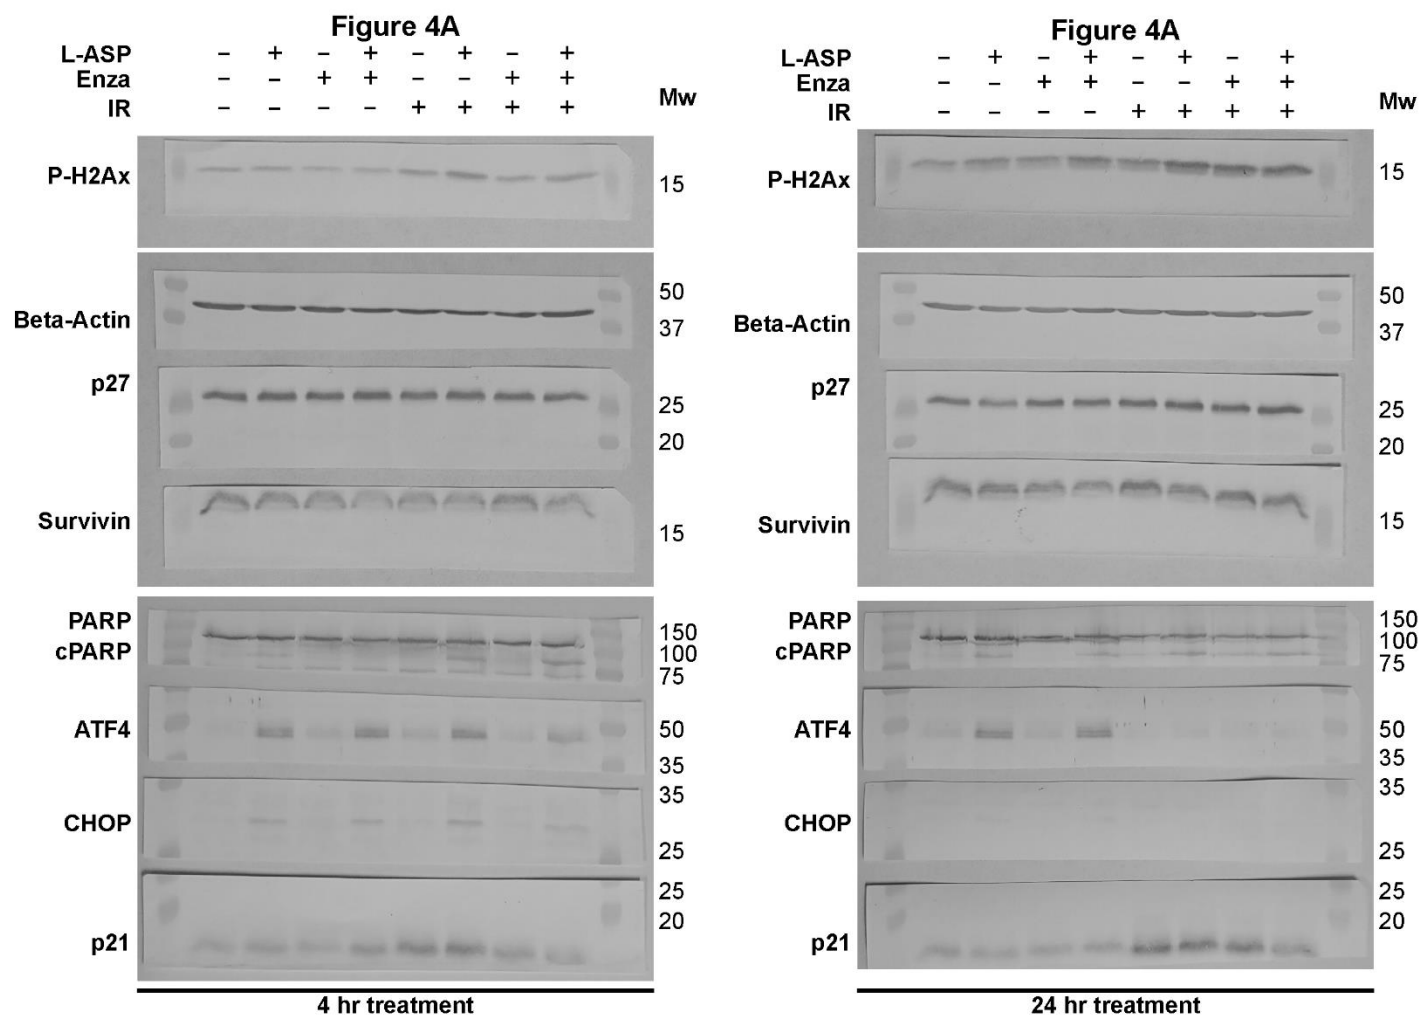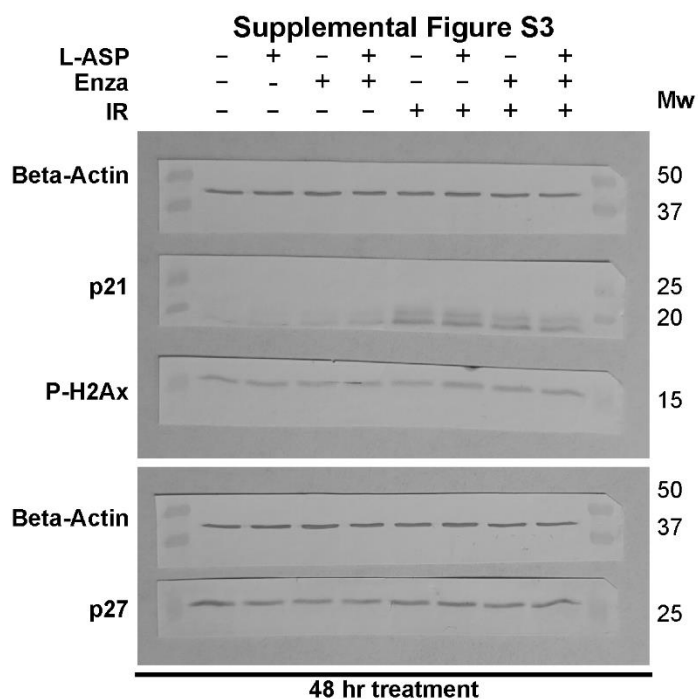

Supplement: s1 [file s1]
